# Conserved sequence motifs in the initiator proteins for rolling circle DNA replication encoded by diverse replicons from eubacteria, eucaryotes and archaeobacteria

Tatyana V.Ilyina<sup>1</sup> and Eugene V.Koonin<sup>1,2\*</sup>

<sup>1</sup>Institute of Microbiology, Academy of Sciences, 117811 Moscow, Russia and <sup>2</sup>National Center for Biotechnology Information, National Library of Medicine, National Institutes of Health, Bethesda, MD 20894, USA

Received March 11, 1992; Revised and Accepted May 26, 1992

## ABSTRACT

An amino acid motif was identified that consists of the sequence HisHydrHisHydrHydrHydr (Hydr—bulky hydrophobic residue) and is conserved in two vast classes of proteins, one of which is involved in initiation and termination of rolling circle DNA replication, or RCR (Rep proteins), and the other in mobilization (conjugal transfer) of plasmid DNA (Mob proteins). Based on analogies with metalloenzymes, it is hypothesized that the two conserved His residues in this motif may be involved in metal ion coordination required for the activity of the Rep and Mob proteins. Rep proteins contained two additional conserved motifs, one of which was located upstream, and the other downstream from the 'two His' motif. The C-terminal motif encompassed the Tyr residue(s) forming the covalent link with nicked DNA. Mob proteins were characterized by the opposite orientation of the conserved motifs, with the (putative) DNA-linking Tyr being located near their N-termini. Both Rep and Mob protein classes further split into several distinct families. Although it was not possible to find a motif or pattern that would be unique for the entire Rep or Mob class, unique patterns were derived for large subsets of the proteins of each class. These observations allowed the prediction of the amino acid residues involved in DNA nicking, which is required for the initiation of RCR or conjugal transfer of single-stranded (ss) DNA, in Rep and Mob proteins encoded by a number of replicons of highly diverse size, structure and origin. It is conjectured that recombination has played a major part in the dissemination of genes encoding related Rep or Mob proteins among the replicons exploiting RCR. It is speculated that the eucaryotic small ssDNA replicons encoding proteins with the conserved RCR motifs and replicating via RCR-related mechanisms, such as

geminiviruses and parvoviruses, may have evolved from eubacterial replicons.

## RATIONALE AND APPROACH

Rolling circle replication (RCR) is one of the basic mechanisms by which circular replicons replicate (1). These replicons (Table 1) include small isometric and filamentous single-stranded (ss) DNA bacteriophages (prototyped by phiX174 and M13, respectively; reviewed in ref. 2), a number of ssDNA plasmids (termed so for the existence of single-stranded circular intermediates in their replication) replicating primarily but not exclusively in gram-positive bacteria (reviewed in refs. 3,4), and P2 and related temperate dsDNA bacteriophages (reviewed in ref. 5). A specific version of RCR including the cell to cell transfer of the displaced DNA strand is utilized in the conjugal mobilization of different types of bacterial plasmids (reviewed in refs. 6–8), and in the transfer of Ti plasmids from *Agrobacterium* to plant cells (reviewed in ref. 9). Recently strong evidence has been reported for the RCR replication of a very different class of circular ssDNA replicons, the plant geminiviruses (10,11). A modification of RCR, the so-called rolling hairpin mechanism, has been implicated in the replication of animal parvoviruses whose genome is linear ssDNA with terminal hairpins (reviewed in ref. 12). Strikingly, RCR also has been demonstrated to be the mode of replication of tiny circular RNAs pathogenic for plants and animals, viroids (virusoids) and hepatitis delta virus, respectively (reviewed in ref. 13).

Apparently, in all DNA replicons that replicate via RCR, it is initiated by a protein encoded by the replicon itself. These proteins possess a DNA nicking-closing and a topoisomerase-like activities (e.g. refs. 14,15). In phage phiX174, by far the best understood RCR system, the phage-encoded A protein nicks the *ori* site in the viral strand of the double-stranded replicative form and remains covalently linked to the 5' end of the cleaved strand. The 3' end is then extended by the DNA polymerase

\* To whom correspondence should be addressed at: National Center for Biotechnology Information, National Library of Medicine, National Institutes of Health, 8600 Rockville Pike, Bethesda, MD 20894, USA

| consensus |             |                     | 1                      | 2                       | 3                      |             |
|-----------|-------------|---------------------|------------------------|-------------------------|------------------------|-------------|
|           |             |                     | <u>futltxxx</u><br>uyp | <u>xpHuHuuux</u><br>u a | <u>uxxYuxkxxx</u><br>h |             |
| 1         | phiX174     | A (200-390)         | FDTLTLAD               | 53 RLHFHAVHF            | 70 VGFYVAKYVN          | A04239      |
| 2         | G4          | A (241-431)         | FDTLTLAD               | 53 RLHFHAVHF            | 70 VGFYVAKYVN          | A04240      |
| 3         | S13         | A (209-399)         | FDTLTLAD               | 53 RLHFHAVHL            | 70 VGFYVAKYVN          | JS0450      |
| 4         | SPV4        | gp2 (76-218)        | FVTLTYSD               | 50 RPHYHICFF            | 44 -ANYTARYTT          | H29825      |
| 5         | Chp1        | P5 (140-284)        | VLILTYDN               | 45 RMHWHMIVF            | 48 I-FYVARYVQ          | JU0348      |
| 6         | BP186       | A (319-487)         | FYTLTAPS               | 48 TPHWHMLMF            | 47 TG-YVAKYIS          | S10632      |
| 7         | EC67        | 2/3 (357-400;1-116) | FYTITCPS               | 48?TVHWHLMCF            | 45 TS-YIAKYIS          | JQ0852/3    |
| 8         | PHASYL      | ARP (87-249)        | FLTLTFRD               | 37 RIHYHLLVA            | 56 IGRYVVGKYIS         | S02390      |
| 9         | pEPLX       | RAP (59-232)        | FITLTLPP               | 50 ALHLHIVMV            | 92 ASAYMGKYL           | M81382 (GB) |
| 10        | pHGN1       | REP (103-238)       | MVTLTAST               | 54 YAHIHILGVF           | 58 LGAYLAAYMA          | S06780      |
| 11        | pGRB1       | REP (94-226)        | MVTLTASS               | 48 YVHIHLGVF            | 57 LGAYLAAYMA          | S10152      |
| 12        | pEHSPN      | REP (50-182)        | MVTLAASS               | 51 YVHIHLGVF            | 47 LGAYLAAYMA          | S00941      |
| 13        | pBAA1       | REP (87-226)        | FLTLTVRN               | 48 HPHFHVLIIP           | 64 ISKYPVKD            | A32059      |
| 14        | pFTB14      | REP (119-258)       | FLTLTVRN               | 48 HPHFHVLLP            | 63 ISKYPVKD            | S01098      |
| 15        | pLP1        | REP (108-244)       | FLTLTVKN               | 49 NQHLHVLLF            | 56 TAKYEVKSAD          | M31323 (GB) |
| 16        | pUB110      | REP (124-255)       | FLTLTVKN               | 49 NQHMHVLCV            | 55 TAKYPVKD            | M19465      |
| 17        | pC194       | REP (97-221)        | FLTLTTPN               | 48 NPHFHVLI             | 49 MAKYSGKSD           | M64604 (GB) |
| 18        | pLAB1000    | REP (106-236)       | FLTLTAEN               | 47 HQHMHVLLF            | 56 TAKYQVSKD           | B35390      |
| 19        | pBC1        | REP (31-168)        | FLTLTVRN               | 53 HPHFHVLLC            | 67 VSKYPVKD            | M64604      |
| 20        | pKYM        | REP (116-252)       | FLTLTVRN               | 46 HPHFHVLLM            | 59 TLKYSVKD            | M38574 (GB) |
| 21        | pSK89       | REP (74-197)        | FLTLTTPN               | 48 NPHFHVLM             | 49 MAKYSGKSD           | M37889 (GB) |
| 22        | pNost       | REP (135-262)       | FVTLTVKN               | 50 HPHFHVLM             | 49 VIKYSVKESD          | M81381 (GB) |
| 23        | pTD1        | REP (114-240)       | FITLTVKN               | 51 HPHYHILAA            | 50 VAKYSVKATD          | M87856 (GB) |
| 24        | ABMV        | AC1 (15-110)        | FLTYPQCS               | 32 EPHLHVLIQ            | 36 VKSYIDKGD           | X15983 (GB) |
| 25        | PYMV        | AC1 (15-110)        | FLTYPQCS               | 32 EPHLHVLIQ            | 36 VKSYVEKGD           | JU0364      |
| 26        | BGMV        | AC1 (15-110)        | FLTYPRCT               | 32 EPHLHALIQ            | 36 VKEYIDKDV           | M10070 (GB) |
| 27        | TGMV        | AC1 (16-110)        | FLTYPQCS               | 32 QPHLHVLIQ            | 36 VKTYIDKGD           | A04170      |
| 28        | CLV         | AC1 (14-109)        | FLTYPKCS               | 32 EPHLHALIQ            | 36 VKSYLDKGD           | S07594      |
| 29        | BCTV        | C1 (15-110)         | FLTYPQCS               | 32 QPHLHVLLQ            | 36 VKSYVDKGD           | X04144 (GB) |
| 30        | TYLCV       | C1 (13-108)         | FLTYPNCS               | 32 EPHLHVLIQ            | 36 VKTYVEKDN           | X15656 (GB) |
| 31        | MSV         | C1 (18-107)         | FLTYPKCP               | 32 SLHLHALLQ            | 30 VRDYILKEPL          | A04171      |
| 32        | DSV         | C1 (15-104)         | FLTYSKCD               | 32 SLHSHALVQ            | 30 VRTYILKNP           | M23022 (GB) |
| 33        | WDV         | C1 (18-113)         | FLTYPECT               | 32 SPHLHVLVQ            | 37 VRDYITKEVD          | B24356      |
| 34        | CSMV        | C1 (42-131)         | FLTYPRCP               | 32 EPHLHAFVQ            | 30 TLKYCMKHE           | JU0043      |
| 35        | MISV        | C1 (15-110)         | FLTYPHCN               | 32 DPHLHVLIQ            | 30 VFYISKTNG           | D01030 (GB) |
| 36        | SLCV        | C1 (15-110)         | FLTYPRCD               | 33 SPHLHCLIQ            | 36 VKNYITKEGD          | M63155 (GB) |
| 37        | SSV         | C1 (15-110)         | FLTYSRCP               | 32 GYHIHVLAQ            | 31 VRAYAMKNP           | M82918 (GB) |
| 38        | pADB201     | REP (12-118)        | LLVYPDSA               | 34 KPHYHIVLA            | 30 MWRYMTH--K          | A32259      |
| 39        | pmV158      | REP (11-128)        | FLLYPESI               | 37 KAHYHVLYI            | 34 MYLYLTHESK          | S05981      |
| 40        | pE194       | REP (22-132)        | FVLYPESA               | 32 KEHYHILVM            | 30 LVRYM1H--M          | A04487      |
| 41        | pWV01       | REP (13-147)        | FLLYPDSI               | 44 KPHYHVYI             | 34 SYEYLTHESK          | X56954      |
| 42        | pFX2        | REP (13-148)        | FLLYPDSI               | 45 NPHYHVYIL            | 34 SYEYLTHESK          | X54310      |
| 43        | pLB4        | REP (32-137)        | IVVYPESL               | 30 KSHYHLVLN            | 30 AVRYLTH--M          | JQ0181      |
| 44        | pIJ101      | REP ( 62-234)       | LVTFTARH               | 78 HPHIHAIVL            | 69 LAEYIAKTQD          | A31844      |
| 45        | pSB24       | REP ( 62-234)       | LVTFTARH               | 76 HPHIHAIVL            | 71 LGEYIAKTQD          | S04020      |
| 46        | IS801       | REP (113-272)       | HLVFTLPD               | 50 HPHVHLSVT            | 83 LGRYLKPP            | S15163      |
| 47        | ?pCHL1      | REP ( 9-108)        | FIKSPIHL               | 33 SSHYHALAA            | 42 LEAYGVKRYK          | S02220      |
| 48        | ?pCpA1      | REP ( 8-112)        | IKSSLHL                | 36 PSHYHALAA            | 42 LEAYGVKRYK          | X62475 (GB) |
| 49        | ?ColE3 (E2) | REP (33-131)        | IAILARFI               | 40 NGHAHLLYA            | 32 DVNYSGLICK          | S04456      |
| 50        | ?CAA        | p52 (316-411)       | FATLTALG               | 29 GQRWHTLVP            | 41 TATYALKEPV          | M81223 (GB) |
| 51        | ?CFDV       | p17 ( 25-148)       | CFSSTESR               | 48 RSHFHITIG            | 49 ERTYCTSTSR          | M29963 (GB) |
| 52        | MVM         | NS1 (175-243)       |                        | GWHCHVLIG               | 51 LLTYKHKQTK          | A29510      |
| 53        | CPV         | NS1 (127-196)       |                        | GWHCHVLLH               | 51 ILTYRHKQTK          | A29962      |
| 54        | FPLV        | NS1 (127-196)       |                        | GWHCHVLLH               | 51 ILTYRHKQTK          | A36608      |
| 55        | MEV         | NS1 (127-196)       |                        | GWHCHVLLH               | 51 ILTYRHKQTK          | A38350      |
| 56        | B19         | NS1 ( 79-147)       |                        | GYHIHVvtG               | 50 IENYLMKKIP          | B24299      |
| 57        | ADV         | NS1 (154-231)       |                        | QFHIHCCLG               | 60 PYKYFNKQTK          | A35529      |
| 58        | AAV         | NS1 ( 88-162)       |                        | YFHMHVlVE               | 56 IPNYLLPKTQ          | A03694      |
| 59        | ADNV        | NS1 (399-456)       |                        | GDHIIHLFS               | 42 IL-YCIRYGI          | M37899 (GB) |
| consensus |             |                     |                        | <u>xpHuHuuux</u><br>u a | <u>uxxYuxkxxx</u><br>h |             |

machinery, whereas A protein still bound to the 5' end of the strand being displaced and complexed with Rep helicase is translocated along the template resulting in the formation of a looped rolling circle. When the replication proceeds the complete circle and the *ori* site is regenerated on the progeny strand, A protein cleaves this site and is transferred to the progeny strand to initiate a new round of replication, whereas the parental strand is concomitantly ligated yielding a single-stranded circle. Thus A protein mediates not only initiation but also termination of RCR. A very similar mechanism has been demonstrated for several ssDNA plasmids of gram-positive bacteria (3; 16–18).

Numerous complete or partial sequences of RCR replicons have been reported. Comparisons of the amino acid sequences of the RCR initiators have led to the delineation of three families of ssDNA plasmid-encoded proteins, with proteins belonging to each of them being obviously related to one another but apparently not to proteins of the other families (15; 19–21). In addition, limited similarities have been noticed between the short sequences surrounding the (putative) DNA-linking Tyr residues in the RCR initiator proteins of various groups of ssDNA plasmids and isometric phages (3, 18, 20–22).

We were interested in comparing the sequences of all known RCR initiator proteins in an attempt to reveal putative motifs universally associated with this function and to gain some insight into the evolution of RCR replicons. The results reported in this paper show that an unexpectedly broad class of RCR replicons but not all of them share conserved amino acid sequence motifs, and that the genes for the respective RCR proteins may have a common origin.

Alignments of the RCR initiator proteins of three groups of bacterial plasmids prototyped by pT181 (19), pUB110 (20,21,23), and pMV158 (15) have been published. In addition, we generated an alignment of the A proteins of the phiX174 group, the related proteins of small ssDNA viruses infecting *Spiroplasma* and *Chlamydia*, and A proteins of two P2-related phages. Data base screening using the program BLASTP (24) revealed significant similarities only among members of the same family. On the other hand, inspection of the alignments showed, somewhat unexpectedly, that the pUB110 family, the pMV158 family, and

the phage family (but not the pT181 family) each encompassed three best conserved motifs that seemed to be related in all three families in terms of both specific amino acid residues conserved and the relative location of the motifs in the polypeptides. The most prominent of these motifs that had the formula HHydrHHydrHydrHydr (Hydr—bulky hydrophobic amino acid residue) was exploited to screen the Non-Redundant Database (NRDB), which is created in the National Center for Biotechnology Information (NCBI) by merging together the non-redundant entries from PIR, Swissprot, and the translated versions of Genbank, using the program DBSITE (J.-M. Claverie, NCBI). Briefly, numerical weight is ascribed to each amino acid residue in each position of the motif, which is a function of the frequency of the given residue in the multiple alignment, and the data base is screened for sequences containing segments scoring above an empirically defined cut-off. The cut-off values were selected so that either one or two of the bulky hydrophobic residues (irregardless of their position in the motif) were allowed to be substituted by any other residue, to detect putative relevant sequences with deviations from the motif formula. The sequences thus retrieved were further scrutinized for the presence of appropriately located segments resembling the other two motifs, and for their possible functional relevance to RCR (using the available literature). The significance of the revealed relationships was checked using the multiple alignment program OPTAL (25). This approach has led to the delineation of two vast classes of related proteins, one of which encompassed 'true' RCR initiators, while the other consisted of proteins mediating plasmid DNA mobilization.

### The RCR initiator (Rep) protein class

This class compiled proteins mediating initiation and termination of RCR not coupled to bacterial conjugation. These proteins were characterized by a coherent arrangement of the three conserved motifs, N-1-2-3-C (Fig. 1). In some of the peripheral members of the class motif 1 was too degenerate to be recognized. Motif 3 included the (putative) DNA-linking Tyr residue(s). It has been shown that in the A protein of phage phiX174 two tyrosines separated by three amino acid residues covalently bind to the 5'

Fig. 1. Conserved sequence motifs in proteins mediating RCR initiation (Rep class). The aligned motifs are excerpts of complete alignments generated by program OPTAL as previously described (25). The motifs are designated as indicated in the text. The amino acid residue numbering in each protein is shown in parentheses. The 'consensus' line includes amino acid residues conserved in all the aligned sequences (upper case; note, however, that one of the conserved His residues in motif 2 is apparently replaced by Arg in the putative initiator protein of the CAA replicon), or in at least one-half of them (lower case); U(u)—a bulky hydrophobic residue (I, L, V, M, F, Y, W); x—no consensus in this position. The (putative) active Tyr residue(s) is marked by an asterisk(s). The proteins, for which the identification of the motifs should be considered tentative because of the absence of closely related sequences, are denoted by question marks. Distinct groups of related proteins are separated by blanks. 1–12, superfamily I—bacteriophage A proteins and related cyanobacterial and archaeobacterial plasmid Rep proteins with two (putative) active Tyr residues. In the genetic element containing the retron EC67 (sequence 7), the sequences related to the A protein of bacteriophage 186 were found in two distinct overlapping ORFs, 2 and 3, with motif 2 located upstream from the proposed initiator codon of ORF 3 (35). SPV4, *Spiroplasma* virus 4; Chp1, *Chlamydia psittaci* phage 1. 13–43, superfamily II—Rep proteins of eubacterial plasmids and geminiviruses with one (putative) active Tyr residue. 13–23—pUB110-related plasmid family. pNost is an unnamed plasmid from *Nostoc* sp. 24–37—geminiviruses. Bipartite geminiviruses: ABMV—abutilon mosaic virus, PYMV—potato yellow mosaic virus, BGMV—bean golden mosaic virus; TGMV—tomato golden mosaic virus, CLV—*Cassava* latent virus, SLCV—squash leaf curl virus. Monopartite geminiviruses: BCTV—beet curly top mosaic virus, TYLCV—tomato yellow leaf curl virus, MSV—maize streak viruses, DSV—*Digitaria* streak virus, WDV—wheat dwarf virus, CSMV—*Chloris* striate mosaic virus, MiSV—*Miscanthus* streak virus, SSV—sugarcane streak virus. 38–43—pMV158-related plasmid family. 44–46—pIJ101-related plasmid family. The published sequence of plasmid pSB24 (46) appeared to contain a frameshift disrupting the similarity with the pIJ101 Rep protein in the C-terminal region and masking the putative active Tyr. The sequence related to that of pIJ101 was found in an alternative ORF, and the reconstructed version of the sequence is presented. IS801 is an insertion sequence from *Pseudomonas syringae* that also has been found in the indigenous plasmid pMMC7105 (47). The functional significance of the similarity between the protein encoded by IS801 and Rep proteins of pIJ101 and pSB24 remains to be elucidated. 52–59—NS1 (non-structural) proteins of parvoviruses. In these proteins motif 1 could not be identified. MVM—minute virus of mice, CPV—canine parvovirus, FPLV—feline panleucopenia virus, MEV—mink enteritis virus, B19—human parvovirus, isolate B19, AAV—adeno-associated virus, ADV—Aleutian disease of mink virus, ADNV—*Aedes albopictus* densoinfection virus. The amino acid sequences were extracted from the PIR bank (Release 31) or were translated using the respective nucleotide sequences from GenBank (Release 71). For each sequence the PIR accession number, or where not available, the GenBank (GB) accession number for the respective nucleotide sequence is indicated.

**Table 1.** Comparison of the replicons encoding RCR initiator proteins

| REPLICON                                                       | DNA STRUCTURE                                     | DNA SIZE, kb | REPLICATION TYPE | ENCODED Rep                                      | PROTEINS          | Mob                                                  | REFERENCE <sup>a</sup> |
|----------------------------------------------------------------|---------------------------------------------------|--------------|------------------|--------------------------------------------------|-------------------|------------------------------------------------------|------------------------|
| Small isometric coliphages                                     | circular ssDNA                                    | 5.4–5.5      | rolling circle   | Superfamily I, two active Tyr (1–3) <sup>b</sup> | None              | None                                                 | 2,26                   |
| SpV4                                                           | circular ssDNA                                    | 4.4          | rolling circle   | Superfamily I two active Tyr (4)                 | None              | None                                                 | 33                     |
| Chlp1                                                          | circular ssDNA                                    | 4.9          | rolling circle   | Superfamily I two active Tyr (5)                 | None              | None                                                 | 34                     |
| Coliphage 186, retron EC67                                     | linear dsDNA with sticky ends able to circularize | 24           | rolling circle   | Superfamily I two active Tyr (6,7)               | None ?            | None                                                 | 5,31,35                |
| Phasyl                                                         | circular ssDNA                                    | 1.3          | rolling circle   | Superfamily I two active Tyr (8)                 | None              | None                                                 | 36,37                  |
| Cyanobacterial plasmid pEE                                     | circular ds/ssDNA <sup>c,d</sup>                  | ?            | rolling circle ? | Superfamily I two active Tyr (9)                 | None              | None                                                 |                        |
| Archaeobacterial plasmids pGRB1, pHGN, pEHSPN                  | circular ds/ssDNA                                 | 1.7–1.8      | rolling circle   | Superfamily I two active Tyr (10–12)             | None              | None                                                 | 38                     |
| Monopartite geminiviruses (e.g. MSV)                           | circular ssDNA                                    | 2.7–3.0      | rolling circle   | Superfamily II, one active Tyr (29–37)           | None              | None                                                 | 10,39                  |
| Bipartite geminiviruses (e.g. CLV)                             | circular ssDNA, 2 molecules                       | 5.1–5.5      | rolling circle   | Superfamily II one active Tyr (24–28)            | None              | None                                                 | 11,39                  |
| Gram-positive bacterial plasmids, pMV158 family (e.g. pADB201) | circular ds/ssDNA                                 | 1.6–2.1      | rolling circle   | Superfamily II one active Tyr (38; 41–43)        | None              | None                                                 | 3, 4, 15               |
| Gram-positive bacterial plasmids, pMV158 family (e.g. pMV158)  | circular ds/ssDNA                                 | 3.7–5.5      | rolling circle   | Superfamily II one active Tyr (39,40)            | Family 2 (11–13)  | None                                                 | 3, 4, 15               |
| Gram-positive bacterial plasmids, pUB110 family (e.g. pLP1)    | circular ds/ssDNA                                 | 1.6–2.1      | rolling circle   | Superfamily II one active Tyr (13–15, 17, 19–23) | None              | None                                                 | 3, 4, 18, 20–23        |
| Gram-positive bacterial plasmids, pUB110 family (e.g. pUB110)  | circular ds/ssDNA                                 | 3.3–4.5      | rolling circle   | Superfamily II one active Tyr (16,18)            | Family 2 (14, 17) | None                                                 | 3, 4, 18, 20–23        |
| Gram-positive bacterial plasmids, pIJ101 family                | circular ds/ssDNA ?                               | 3.7–8.8      | rolling circle ? | Separate group within the 'Rep' class (44–46)    | None              | None                                                 | 3                      |
| Chlamydial plasmids pCHL1, pCpA1                               | circular ds/ssDNA                                 | 7.5          | rolling circle ? | Separate family within the 'Rep' class (47,48)   | None              | None                                                 |                        |
| Promiscuous plasmids, IncQ family                              | circular dsDNA                                    | 8.7–12.6     | theta            | None                                             | Family 3 (21–23)  | None                                                 | 40                     |
| Promiscuous plasmids IncI, P families                          | circular dsDNA                                    | app. 120     | theta            | None                                             | Family 1 (1–4)    | None                                                 | 8, 32                  |
| Agrobacterial Ti plasmids                                      | circular dsDNA                                    | app. 100     | theta            | None                                             | Family 1 (8–10)   | None                                                 | 9, 27                  |
| Gram-negative bacterial F factor-related plasmids              | circular dsDNA                                    | app. 100     | theta            | None                                             | None              | Separate group 6, 7, 30 within the Mob class (19,20) |                        |
| Gram-negative bacterial ColE2,3 plasmids                       | circular dsDNA                                    | app.7        | ?                | Separate group within the 'Rep' class (49)       | None              | None                                                 | 41                     |
| Parvoviruses                                                   | linear ssDNA                                      | 4.0–5.5      | rolling hairpin  | Separate family within the 'Rep' class (52–59)   | None              | None                                                 | 12                     |
| Coconut foliar decay virus (circovirus ?)                      | circular ssDNA                                    | 1.3          | rolling circle ? | Separate group within the 'Rep' class ? (51)     | None              | None                                                 | 42                     |
| Chicken anaemia agent (circovirus ?)                           | circular ssDNA                                    | 2.2          | rolling circle ? | Separate group within the 'Rep' class ? (50)     | None              | None                                                 | 43                     |
| Gram-positive bacterial plasmids, pT181 family (e.g. pS194)    | Circular ds/ssDNA                                 | 4.4–4.6      | rolling circle   | pT181 family unrelated to the 'Rep' class        | Family 1 (5–7)    | None                                                 | 3, 4, 14, 19           |
| Gram-positive bacterial plasmids, pT181 family (e.g. pT181)    | circular ds/ssDNA                                 | 4.4–4.5      | rolling circle   | pT181 family unrelated to the 'Rep' class        | Family 2 (15–18)  | None                                                 | 3, 4, 14, 19           |

<sup>a</sup> Selected references describing functional characterization and/or gene organization of the respective replicons are included; where the available data were limited to sequences, references are not indicated.

<sup>b</sup> The numbers of the respective sequences in Fig. 1 (Rep proteins), or in Fig. 2 (Mob proteins) are indicated in parentheses.

<sup>c</sup> The DNA structure of several groups of plasmids is designated ds/ssDNA to emphasize the existence of ssDNA replicative intermediates.

<sup>d</sup> The question marks indicate that data on the respective item are non-available or uncertain.

|           |              | 3          |            | z              |                 | 2a          |              |           |                   |    |                    |             |
|-----------|--------------|------------|------------|----------------|-----------------|-------------|--------------|-----------|-------------------|----|--------------------|-------------|
| consensus |              | xxxxxxnYxx |            | xxxHuUUXSfxgex |                 | uxuaxxuHxdx |              | 2         |                   |    |                    |             |
| 1         | RP4 TraI     | (13-130)   | AGL-AN-YIT | 41             | DKTYBLIV-SFRAGE | 22          | HQRISAVHNDT  | consensus | xpxHuBuuuuxxxxxxx |    |                    |             |
| 2         | R751 TraI    | (13-130)   | AEL-VK-YIT | 41             | DKTYHLLV-SFRAGE | 22          | HQRVSAVHNDT  | 1         | RP4 TraI          | 0  | DNLHIIAINKIHPTRH   | NA          |
| 3         | R64 NikB     | (47-178)   | SRL-VD-YAT | 56             | DPVFHYIL-SMQSHE | 22          | HQYVSAVHTDP  | 2         | R751 TraI         | 0  | DNLHIIAINKIHPTRN   | NA          |
| 4         | pTF-FC2 MobA | (1-76)     |            | 12             | DTINHYYL-SWREG  | 22          | HQAIYGLHADP  | 3         | R64 NikB          | 0  | DNLVHVAVNRVHPETG   | B38529      |
| 5         | pS194 Rlx    | (10-114)   | SRA-IN-YA- | 33             | VQA-HtVIQSFKPE  | 20          | YQVAVYTHTDK  | 4         | pTF-FC2 MobA      | 0  | DNLHLHLAINRVHPETL  | M57717 (GB) |
| 6         | pC223 Rlx    | (10-114)   | SRA-IN-YA- | 33             | NEG-HVVIQSFKPE  | 20          | HQVAVYTHNDT  | 5         | pS194 Rlx         | 0  | DHYHNIHIIINSVNLETG | S00935      |
| 7         | pC221 Rlx    | (10-114)   | SRA-IN-YA- | 33             | IQA-HTVIQSFKPE  | 20          | HQVAVYTHTDK  | 6         | pC223 Rlx         | 0  | DHYHNIHIIINSVNLETG | X12831 (GB) |
| 8         | pTIA5 VirD2  | (20-147)   | INQ-LE-YLS | 48             | ELTTHIIV-SFPAGT | 25          | YNYLTAFAHIDR | 7         | pC221 Rlx         | 0  | DHYHNIHIIINSVNLETG | A04494      |
| 9         | pTIA6 VirD2  | (20-147)   | INQ-LE-YLS | 48             | DLTTHIIV-SFPAGT | 25          | YNYLTAFAHIDR | 8         | pTIA5 VirD2       | 0  | DHPHLHVVVNRRELLGH  | B37763      |
| 10        | pRIA4 VirD2  | (20-147)   | INQ-LE-YLS | 48             | ELTTHIIV-SFPAGT | 25          | YNYLTAFAHIDR | 9         | pTIA6 VirD2       | 0  | DHPHLHVVVNRRELLGH  | B25063      |
|           |              |            |            |                |                 |             |              | 10        | pRIA4 VirD2       | 0  | DHPHLHVVVNRRELLGH  | S06884      |
| 11        | pMV158 Mob   | (33-145)   | RSH-LN-YEL | 73             |                 |             | IAYA-SVHLDE  | 11        | pMV158 Mob        | 0  | STPHMHMGVVPF-ENGK  | A33952      |
| 12        | pGI2 Mob     | (34-144)   | KSE-QN-YDL | 72             |                 |             | tLYA-MVHMDE  | 12        | pGI2 Mob          | 0  | ATPHMHIGVMPITEDNR  | S02050      |
| 13        | pE194 Mob    | (34-146)   | ETY-KN-YDL | 73             |                 |             | MLYA-TVHLDE  | 13        | pE194 Mob         | 0  | RVPMHMGFVPLTEDGR   | A04486      |
| 14        | pLAB1000 Mob | (33-144)   | RSH-LN-YDL | 73             |                 |             | IRYA-VVHMDE  | 14        | pLAB1000 Mob      | 0  | KTPHMHMGIVPFDDDKK  | A35390      |
| 15        | pT181 Mob    | (33-144)   | KTY-LN-YDL | 73             |                 |             | LLYA-TVHMDE  | 15        | pT181 Mob         | 0  | KTPHMHYGVPVITDDGR  | J01764      |
| 16        | pT913 Mob    | (33-144)   | RSH-EN-YDL | 73             |                 |             | IAYA-TVHVDE  | 16        | pT913 Mob         | 0  | KTPHMHMGVVPF-RDGG  | S05987      |
| 17        | pUB110 Mob   | (33-144)   | RTR-EN-YDL | 73             |                 |             | IAYA-TVHMDE  | 17        | pUB110 Mob        | 0  | QTPHMHMGVVPF-RDGG  | M19465 (GB) |
| 18        | pTx14-3 Mob  | (27-152)   | RLH-ENIYFV | 85             |                 |             | AVYNMVHLHDE  | 18        | pX14-3 Mob        | 0  | ANPHLHINYPNFESSR   | X56204 (GB) |
| 19        | ?R100 TraI   | (69-170)   | KGR-PG-YDL | 56             |                 |             | LVMALFNHDTS  | 19        | ?R100 TraI        | 4  | PQLBTHVAVVANVTQHNG | S10660      |
| 20        | ?F TraI      | (69-170)   | RHR-PG-YDL | 56             |                 |             | LVMALFNHDTS  | 20        | ?F TraI           | 4  | PQLBTHVAVVANVTQHNG | M54796 (GB) |
| 21        | pSC101 Mob   | (13-135)   | ASPBAD-YIA | 80             |                 |             | YQFA--IHNP-  | 21        | Mob pSC101        | 7  | EQPHAHIMFS--ERIND  | X01654      |
| 22        | RSF1010 MobA | (13-131)   | ARAKAD-YIQ | 78             |                 |             | PYLA--IHA--  | 22        | MobA RSF1010      | 3  | ENPHCHLMISE-RIN-D  | JH0126      |
| 23        | pTF1 MobL    | (17-169)   | ATGAAA-Y-- | 91             |                 |             | AAVA--LHAD-  | 23        | MobL pTF1         | 28 | GNWHAHILLSACRVQPD  | S12190      |
|           |              |            |            |                |                 |             | u            | consensus |                   |    | xpxHuBuuuuxxxxxxx  |             |
| consensus |              |            | xxxxxxnYxx |                |                 |             | uxuaxxuHxdx  |           |                   |    |                    |             |
|           |              |            |            |                |                 |             |              |           |                   |    |                    |             |

**Fig. 2.** Conserved sequence motifs in proteins mediating initiation of conjugal transfer of plasmid DNA (Mob class). The designations are as in Fig. 1. The motifs are designated as in the Rep proteins, with motif containing the (putative) active Tyr designated 3 in spite of its location upstream from motif 2; z—a specific motif found in the Mob proteins of family 1; 2a—the upstream portion of motif 2 that is separated by a spacer from the downstream portion in sequences 19–23. 1–10, family 1—Mob proteins of IncI and IncP plasmids (1–4), gram-positive bacterial ssDNA plasmids of the pT181 family (5–7), and Ti plasmids of *Agrobacterium* (8–10). For the plasmid pTF-FC2 only a partial sequence has been reported. 11–18, family 2—Mob proteins of gram-positive bacterial ssDNA plasmids. 21–23, family 3—Mob proteins of IncQ plasmids. NA—accession number not available, the sequences were from ref. 32.

**Table 2.** Unique sequence motifs and patterns in RCR proteins

| MOTIF/PATTERN <sup>a</sup>                                        | SET OF PROTEINS SELECTED                                                                                                                           |
|-------------------------------------------------------------------|----------------------------------------------------------------------------------------------------------------------------------------------------|
| 2 <sup>b</sup> –[PAU]HUH[AU][CU][AU] <sup>c</sup>                 | Bacteriophage A proteins and related proteins with two (putative) active Tyr residues                                                              |
| 3–Y[TU]A[KR]Y                                                     |                                                                                                                                                    |
| 1–[FILV][ILV][ILVT]YP                                             | Rep proteins of pMV158-related plasmids and geminiviruses (one active Tyr)                                                                         |
| 2–H[ILVFWST]H[ILVMAC][ILVMFYW][ILVMFYWAC]                         |                                                                                                                                                    |
| 3–[ILVMAST] <sub>2</sub> Y[ILVMAC] <sub>x</sub> [KH] <sup>d</sup> | Mob proteins of Ti plasmids, IncP and IncI plasmids, and Gram-positive bacterial ssDNA plasmids (families 1 and 2 of the Mob class) <sup>e,f</sup> |
| 2–HxDx2[PU]HxHUxU                                                 |                                                                                                                                                    |

<sup>a</sup> We define a motif as a constellation of conserved amino acid residues that may include short spacers of strictly defined length, and a pattern as a group of motifs that may be separated by spacers of arbitrary length (44). Search for a pattern included consecutive screening of NRDB with the respective motifs.

<sup>b</sup> The motifs are numbered as in the text and in Figs. 1 and 2.

<sup>c</sup> The residues shown in brackets are alternatives; U—bulky hydrophobic residue.

<sup>d</sup> x—any residue.

<sup>e</sup> One irrelevant sequence was retrieved upon screening NRDB with this motif.

<sup>f</sup> A more specific version of this motif has been described by Pansegrau and Lanka as the identifier of a set of Mob proteins coinciding with our family 1 (45).

end of the nicked viral strand, and a model of their alternate participation in the cleavage-ligation reaction has been suggested (26). The conservation of these two Tyr residues was a hallmark of a distinct superfamily within the Rep class including mainly bacteriophage A proteins but also Rep proteins of certain halobacterial and cyanobacterial plasmids. Another large superfamily brought together the (putative) RCR initiator proteins of two families of eubacterial plasmids, and unexpectedly of plant geminiviruses (Table 1, Fig. 1). These proteins appear to have only one active Tyr residue. Its tentative identification by site-

directed mutagenesis has been described for the plasmid pKYM (22).

### The mobilization (Mob) protein class

The proteins of the Mob class contained only two universally conserved motifs, which were oriented differently from the Rep proteins, with the (putative) active Tyr being located N-terminally of motif 2 (Fig. 2). Experimental identification of this residue in VirD2 protein of a Ti plasmid has been reported (27). This class included at least three distinct families, with one of them

(Family 1) uniting Mob proteins of such diverse replicons as Ti plasmids, on the one hand, and small ssDNA plasmids from Gram-positive bacteria, on the other hand (Table 1). The proteins of this family contained additional well defined motifs (Fig. 2). Although the sequence conservation around the putative active Tyr was poor in Mob proteins (Fig. 2), its assignment for the proteins of the families 1, 2 and 3 was confirmed by statistically significant alignments of relatively closely related sequences. Caution is due in the interpretation of the putative motifs in Tral proteins of F-related plasmids that had no close relatives to corroborate the assignments.

#### Unique sequence patterns

It appeared not to be possible to define a sequence motif or pattern that would selectively extract from the sequence bank all the RCR proteins, or at least the proteins of either of the two classes (Rep or Mob) without retrieving any false positives. However, unique patterns typical of large subsets of these proteins could be derived (Table 2) and hopefully will be useful for easy identification of RCR proteins in newly sequenced replicons.

#### The possible function of the 'two His' motif

Motif 2 containing two His residues embedded in a highly hydrophobic sequence is the only common denominator of the Rep and Mob classes of the RCR proteins (compare Figs. 1 and 2). The data base searches revealed the (partial) conservation of this motif, in addition to the RCR proteins, in various groups of metalloenzymes, particularly in cytochrome c oxidase polypeptide I, hemocyanins, and carbonic anhydrases. Histidine residues have been shown to act as ligands to metal centers in many enzymes. In cytochrome oxidases the 'two His' motif formula was conserved from bacteria to mammals, and at least one of the two conserved His residues has been implicated as a Cu ion ligand (28). In carbonic anhydrases, superoxide dismutases and procatechuate 3,4-oxygenase His groups located two residues apart and surrounded by hydrophobic residues have been shown to interact with the same metal ion (29). An additional typical feature of many proteins with His as a metal ligand is the presence of a Pro residue within two residues of the binding His (29). A Pro residue was found in the position preceding the first conserved His in about one-half of the RCR proteins (Figs. 1, 2). The reactions catalyzed by these proteins require  $Mg^{2+}$  or  $Mn^{2+}$  (e.g. refs. 2, 30). Thus it is tempting to speculate that the conserved His residues in the 'two His' motif function as ligands to these metal ions.

#### Summary of functional predictions

This analysis highlighted the previously unsuspected relationship between the proteins involved in the DNA replication of plant geminiviruses (detailed elsewhere, Koonin & Ilyina, submitted) and animal parvoviruses, and procaryotic RCR proteins. These findings are compatible with what is known of the replication mechanisms of these viruses (see above). Also, the conserved motifs delineated here are predicted to be of crucial importance for the functions of RCR proteins and may serve as plausible targets for site-directed mutagenesis experiments. In particular, the active Tyr residue(s) was predicted for numerous RCR proteins, including A protein of bacteriophage 186 (Fig. 1), and Tral proteins of IncF and IncP plasmids that are objects of intensive studies (30–32). The strength of prediction is the highest when the functional relevance of the motifs could be confirmed by their conservation in an alignment of a family of

definitely related sequences. If such evidence was not available, the predictions should be treated with some reserve (Figs. 1,2).

#### Some implications for the evolution of RCR replicons

It seems unlikely that a similar arrangement of the three conserved RCR motifs, as observed in the Rep proteins (Fig. 1), could have evolved independently in several evolutionary lineages. The hypothesis of divergent rather than convergent origin of the proteins of this class is supported by the fact that these motifs are not universally required in RCR-mediating proteins as shown by the comparative sequence analysis of the Rep proteins of the pT181-related plasmids and filamentous phage gene II proteins (ref. 19, and E. V. K. and T. V. I., unpublished observations). The same notions apply to the Mob protein class. The relationship between these two classes that have only one motif in common remains uncertain.

Related RCR proteins are encoded by extremely diverse replicons, from the smallest and most primitive such as phasyl (apparently the smallest known DNA replicon) and some of the ssDNA plasmids, of which these proteins are the only products, and up to such relatively large and complex as phage 186, *E. coli* F factor, or Ti plasmids (Table 1). Some of the small plasmid replicons encode both a Rep protein and a Mob protein, and there are several cases when of two plasmids with closely related Rep proteins one encodes a Mob protein, whereas the other lacks the respective gene (Table 1). This is compatible with the so-called cassette concept of the evolution of plasmids of gram-positive bacteria, which conjectures that these plasmids consist of two relatively independent gene cassettes, the replication one and the mobilization one that are readily exchangeable (19, 23). Recombination, both at the level of fusion and/or separation of gene portions encoding different domains of the RCR proteins, and at the level of the exchange of the genes encoding RCR proteins between different replicons, appeared to have made a major contribution to the evolution of this type of DNA replication.

Finally, these findings raise the question of the origin of small eucaryotic ssDNA replicons, such as geminiviruses, parvoviruses, and circoviruses, from procaryotic plasmids or phages.

#### ACKNOWLEDGEMENTS

E.V.K. is grateful to Dr. J.-M. Claverie for providing the program DBSITE, and to Drs. D.J. Lipman and J.C. Wootton for critical reading of the initial draft of this manuscript.

#### REFERENCES

- Gilbert, W., and Dressler, D. (1968) *Cold Spring Harbor Symp. Quant. Biol.* 33, 473–484.
- Baas, P. D., and Jansz, H. S. (1988) *Curr. Top. Microbiol. Immunol.* 136, 31–70.
- Gruss, A., and Ehrlich, S. D. (1989) *Microbiol. Rev.* 53, 231–241.
- Novick, R. P. (1989) *Annu. Rev. Microbiol.* 43, 537–565.
- Bertani, L. E., and Six, E. W. (1988) In *The Bacteriophages* (R. Calendar, ed.), Plenum Press, New York, pp. 73–143.
- Willets, N., and Wilkins, B. (1984) *Microbiol. Rev.* 48, 24–41.
- Willets, N., and Skurray, R. (1987) In F. C. Neihardt, J. L. Ingraham, K. B. Low, B. Magasanik, M. Schaechter & H. E. Umbarger (ed.), *Escherichia coli and Salmonella typhimurium: cellular and molecular biology*, vol. 2. American Society for Microbiology, Washington, DC, pp. 1110–1133.
- Guiney, D. G., and Lanka, E. (1989) In C. M. Thomas (ed.), *Promiscuous plasmids of Gram-negative bacteria*. Academic Press Inc., London, pp. 27–56.

9. Zambryski, P. (1988) *Annu. Rev. Genet.* **22**, 1–30.
10. Stenger, D. C., Revington, G. N., Stevenson, M. C., and Bisaro, D. M. (1991) *Proc. Natl. Acad. Sci. USA* **88**, 8029–8033.
11. Saunders, K., Lucy, A., and Stanley, J. (1991) *Nucleic Acids Res.* **19**, 2325–2330.
12. Berns, K. I. (1990) *Microbiol. Rev.* **54**, 316–329.
13. Symons, R. H. (1989) *Trends Biochem. Sci.* **14**, 445–450.
14. Koepsel, R. R., Murray, R. W., Rosenblum, W. D., and Khan, S. A. (1985) *Proc. Natl. Acad. Sci. USA* **82**, 6045–6049.
15. De la Campa, A. G., Del Solar, G. H., and Espinosa, M. (1990) *J. Mol. Biol.* **213**, 247–262.
16. Te Riele, H., Michel, B., and Ehrlich, S. D. (1986) *Proc. Natl. Acad. Sci. USA* **83**, 2541–2545.
17. Te Riele, H., Michel, B., and Ehrlich, S. D. (1986) *EMBO J.* **5**, 631–637.
18. Gros, M. F., te Riele, H., and Ehrlich, S. D. (1987) *EMBO J.* **6**, 3863–3869.
19. Projan, S., and Novick, R. (1988) *Plasmid* **19**, 203–221.
20. Bouia, A., Brungel, F., Frey, L., Kammerer, B., Belarbi, A., Guyonvarch, A., and Hubert, J.-C. (1989) *Plasmid* **22**, 185–192.
21. De Rossi, E., Milano, A., Brigidi, P., Bini, F., and Riccardi, G. (1992) *J. Bacteriol.* **174**, 638–642.
22. Yasukawa, H., Hase, T., Sakai, A., and Masamune, Y. (1991) *Proc. Natl. Acad. Sci. USA* **88**, 10282–10286.
23. Jossen, K., Soetaert, P., Michiels, F., Joos, H., and Mahillon, J. (1990) *J. Bacteriol.* **172**, 3089–3099.
24. Altschul, S. F., Gish, W., Miller, W., Myers, E. W., and Lipman, D. J. (1990) *J. Mol. Biol.* **215**, 403–410.
25. Gorbalenya, A. E., Blinov, V. M., Donchenko, A. P., and Koonin, E. V. (1989) *J. Mol. Evol.* **28**, 256–268.
26. Van Mansfeld, A. D., Van Teeffelen, H. A., Baas, P. D., and Jansz, H. S. (1986) *Nucleic Acids Res.* **14**, 4229–4238.
27. Vogel, A. M., and Das, A. (1992) *J. Bacteriol.* **174**, 303–308.
28. Saraste, M. (1990) *Q. Rev. Biophys.* **23**, 331–366.
29. Chakrabarti, P. (1990) *Protein Eng.* **4**, 57–63.
30. Inamoto, S., Yoshioka, Y., and Ohtsubo, E. (1991) *J. Biol. Chem.* **266**, 10086–10092.
31. Sivaprasad, A. V., Jarvinen, R., Puspurs, A., and Egan, J. B. (1990) *J. Mol. Biol.* **213**, 449–463.
32. Ziegelin, G., Pansegrau, W., Strack, B., Balzer, D., Kroger, M., Kruft, V., and Lanka, E. (1991) *DNA Sequence* **1**, 303–327.
33. Renaudin, J., Pascarel, M. C., and Bove, J.M. (1987) *J. Bacteriol.* **169**, 4950–4961.
34. Storey, C. C., Lusher, M., and Richmond, S. J. (1989) *J. Gen. Virol.* **70**, 3381–3390.
35. Hsu, M.-Y., Inouye, M., and Inouye, S. (1990) *Proc. Natl. Acad. Sci. USA* **87**, 9454–9458.
36. Seufert, W., Lurz, R., and Messer, W. (1988) *EMBO J.* **7**, 4005–4010.
37. Gielow, A., Diederich, L., and Messer, W. (1991) *J. Bacteriol.* **173**, 73–79.
38. Sioud, M., Baldacci, G., Forterre, P., and De Recondo, A.-M. (1988) *Nucleic Acids Res.* **16**, 7833–7842.
39. Davies, J. W., and Stanley, J. (1989) *Trends Genet.* **5**, 77–81.
40. Drolet, M., Zanga, P., and Lau, P. C. (1990) *Molec. Microbiol.* **4**, 1381–1391.
41. Kido, M., Yasueda, H., and Itoh, T. (1991) *Nucleic Acids Res.* **19**, 2875–2880.
42. Rohde, W., Randles, J., Langridge, P., and Hanold, D. (1990) *Virology* **176**, 648–651.
43. Claessens, J. A. J., Schrier, C. C., Mockett, A. P. A., Jagt, E. H. J. M., & Sondermeijer, P. J. A. (1991) *J. Gen. Virol.* **72**, 2003–2006.
44. Hodgman, T. C. (1989). *CABIOS* **5**, 1–13.
45. Pansegrau, W., and Lanka, E. (1991) *Nucleic Acids Res.* **19**, 3455.
46. Bolotin, A. P., Sorokin, A. V., Aleksandrov, N. N., Danilenko, V. N., Kozlov, Yu. I. (1985) *Dokl. Akad. Nauk SSSR* **283**, 1014–1017 (in Russian).
47. Romantschuk, M., Richter, G. Y., Mukhopadhyay, P., and Mills, D. (1991) *Molec. Microbiol.* **5**, 617–622.
